1 **Individual and community-level determinants of intention to use**  
2 **contraceptive among married women in Ethiopia: A multi-level analysis of**  
3 **National Survey**

4 Kegnie Shitu<sup>1</sup>, Adugnaw Zeleke Alem<sup>2</sup>, Tesfa Sewunet Alemneh<sup>2</sup>, Bewuketu Terefe<sup>3\*</sup>

5  
6 <sup>1</sup>Department of Health Education and Behavioral Science, Institute of Public Health, College of  
7 Medicine and Health Sciences, University of Gondar, Gondar, Ethiopia

8 <sup>2</sup>Department of Epidemiology and Biostatistics, Institute of Public Health, College of Medicine  
9 and Health Sciences, University of Gondar, Gondar, Ethiopia

10 <sup>3\*</sup>Department of Community Health Nursing, School of Nursing, College of Medicine and  
11 Health Sciences, University of Gondar, Gondar, Ethiopia

12 **Abstract**

13 **Background:** Contraceptives are the most effective strategies to prevent unwanted pregnancies  
14 and their consequences. Realizing intention to use contraceptives is a crucial stage to draft and  
15 implement a successful family planning program.

16 **Objective:** This study aimed to identify individual and community level of factors affecting  
17 women's intention to use contraceptives in Ethiopia.

18 **Method:** This study was based on a large national survey, Ethiopian Demographic and Health  
19 Survey. A total weighted sample of 6,555 married/in union reproductive-age women were  
20 included. Because of the hierarchical nature of the DHS data, a multilevel logistic regression  
21 model was used to study individual and community-level factors that may influence intention to

22 contraceptive use. A 95% confidence interval and a p value of less than 0.05 were used to  
23 declare statistical significance.

24 **Result:** The overall intention to use contraceptives was 48.63% (95% CI 47.42, 49.84).  
25 Participants' age range of 25-34 years (AOR = 0.42, 95 CI% (0.22, 0.79)) and 35-49 years (AOR  
26 = 0.12, 95% CI: (0.05, 0.28)), husband with primary education (AOR = 1.60, 95% CI: (1.02,  
27 2.50)), heard of contraceptives from their community (AOR = 1.91. 95% CI: (1.29, 2.83)), ever  
28 used contraceptives (AOR = 4.48, 95% CI: (2.91, 6.88)) and having six or more children (AOR =  
29 0.46, 95% CI: (0.23, 0.9)) were individual factors significantly associated with interceptive  
30 intention. From community level factors, high community family planning utilization rate  
31 (AOR = 2.29, 95% CI: (1.36,3.86)) was associated with intention to use contraceptive.

32 **Conclusion:** More than half of married women were not intended to use contraceptives.  
33 Intention to use contraceptive was affected by individual and community level attributes. Thus,  
34 public health interventions particularly that could increase information dissemination regarding  
35 contraceptives among the communities and enhance community level contraceptive utilization  
36 rate are required at the national level to improve contraceptive utilization.

37 **Keywords:** Intention to contraception, married women, Multilevel analysis, Contraceptive,  
38 Ethiopia

## 39 **Introduction**

40 A couple's purposeful effort to restrict or space the number of children they have through the use  
41 of contraceptive techniques is referred to as family planning. Contraceptive methods are divided  
42 into two categories: modern and old. Male and female sterilization, the intrauterine contraceptive  
43 device (IUD), implants, injectables, the pill, male and female condoms, emergency

44 contraception, the standard 9 days method (SDM), and the lactational amenorrhea method are all  
45 examples of modern approaches (LAM). Traditional approaches include things like rhythm,  
46 withdrawal, and other folk methods(1).

47 Reports pointed out that, in 2019 there were about 1.1 billion reproductive age women who have  
48 a need to use contraceptive methods, however, around 270 million of them had faced unmet need  
49 of contraceptive methods(2, 3). Sustainable development goals (SDG) and united nations world  
50 family planning report indicated that the total of rate satisfaction of mothers in family planning is  
51 stopped at around 78%, nevertheless due to several hindering factors the rate satisfaction in  
52 Africa regions has shown lowest rate (56%)(4). If all low and middle countries can satisfy  
53 women in contraceptive services, they will have a chance of reduced unintended pregnancies,  
54 unplanned births, and induced abortions approximately by three-quarters from 39 million to 22  
55 million, from 30 million to 7 million and from 48 million to 12 million every single year  
56 respectively with 76,000 fewer maternal deaths(5).

57 In the present scientific fact, the global community has reached on consensus agreements  
58 regarding family planning by reducing the number of women's exposure to pregnancies, by  
59 limited more than 4 births (6, 7), reducing unsafe abortion from unintended pregnancies (8, 9),  
60 declining newborn and infant mortality rates (5), preventing the transmission of HIV/AIDS from  
61 the mother to the child by 93% (10), empowering mothers and girls by staying them in  
62 school(11), by improving adolescents' reproductive health, social and economic wellbeing(12).

63 The task of family planning is exponentially difficult and daunting in sub Saharan Africa (SSA),  
64 hence According to the world bank project report the number of populations SSA has shown an  
65 increasement of about ten times between 1990 and 2050(13), this in turn shows population

66 growth is fast in Africa(14). SSA has shown a few declines from 6.3 to 4.6 births per women  
67 from 1990 to 2019(14).

68 Like the rest of the world community, Ethiopia is struggling with family planning issues and has  
69 tried to increase contraception coverage by 69% by 2020, however has failed and it needs other  
70 fertility and family planning implications (15). Studies on contraception prevalence in Ethiopia  
71 show that it is low and far apart in terms of prevalence from one to other studies. For  
72 illustrations, a study conducted in Benishangul Gumuz revealed that the prevalence of  
73 contraceptive was 18.6%(16), 38% in southern Ethiopia Wolayita Sodo(17), 19.9% in eastern  
74 Ethiopia (18). Other two important studies were also conducted based on demographic and  
75 health survey data on contraceptive prevalence to use and discontinuation discovered that  
76 20.42% and 32.2% respectively(19, 20). Children born from mothers who use modern  
77 contraceptive methods have high rate of survival implications than their counterparts(21). Such  
78 studies also identified some crucial factors which have positive or negative statistical  
79 implications on contraceptive method use. This includes age, educational level, knowledge,  
80 attitude (16, 17), residence, region, occupational status, number of children, women self-  
81 decision, television watching (19, 20), counseling on contraceptive methods, (16, 20), myths and  
82 misconceptions(17). There were also some other factors associated with intention to use  
83 contraceptive methods. Fear of side effects, male partner opposition, inter spousal discussion,  
84 discussion with health care providers, perceived cultural acceptability, status of gravidity, marital  
85 status and post-natal care utilization were among the variables associated with the outcome  
86 variable(22-27).

87 This study addresses two major research objectives. First, studies done on contraceptive methods  
88 in Ethiopia are so limited in study area and study population that is difficult to determine for the

89 general population of the country. Second, these studies did not include events that may have a  
90 potential effect on intention to use contraception methods at community level factors. Therefore,  
91 this study aimed to include both individual and community level factors to determine the  
92 intention to use contraceptive methods among married reproductive women. Identifying  
93 important factors affecting intention to use contraceptive methods at the community and  
94 individual level, this study contributes to Ethiopia, would have a paramount importance to  
95 increase birth control by controlling birth rates. Policymakers and other stakeholders working on  
96 family planning, women and children's health will access an up-to-date nationwide result from  
97 the findings of this study to develop, improve and implement their plans accordingly.

## 98 **Methods**

### 99 **Data source, population, and sampling procedure**

100 The present study was based on the most recent Ethiopian Demographic and Health Survey  
101 (EDHS) data. The survey was conducted from January 18, 2016, to June 27, 2016. For this  
102 survey, a complete list of 84, 915 Enumeration Areas (EAs) from the Ethiopian Population and  
103 Housing Census was used as a sampling frame. A stratified two-stage cluster sampling technique  
104 was employed. In the first stage, 645 EAs were selected. In the second stage, an average of 28  
105 households was selected per cluster/EA. The data is freely available in public and we accessed  
106 the dataset used for the present study after we registered and received an authentication letter  
107 from the Demographic and Health Survey (DHS) program at The DHS Program - Ethiopia:  
108 Standard DHS, 2016 Dataset. For this study, a total weighted sample of 6, 555 married/in union  
109 women who are not using contraceptive were included. Detailed information about the sampling  
110 strategy, questioner, or other important information is available in EDHS of 2016(28).

## 111 **Variables of the Study**

112 The outcome variable of the present study was the intention to use contraceptives among  
113 contraceptive non-user women. The variable was dichotomized into **1** = “Intended” and **0** = “Not  
114 intended”. The independent variables were further classified into individual level (level 1)  
115 variables and community level (level 2) variables. Individual-level variables included age,  
116 religion, educational status, husband’s/partner’s age and education, family wealth index, current  
117 working status, family planning message exposure, knowledge of family planning methods, ever  
118 use of contraceptive, fertility preference, desire to have children, and a number of children.  
119 Whereas, community variables involved variables directly taken with no aggregation (residence  
120 and contextual region), and variables obtained by aggregating individual variables into their  
121 respected community (community poverty, community female education, community family  
122 planning message exposure, community antenatal care service utilization rate, community family  
123 planning utilization rate, community women’s education, and community health facility  
124 distance). The aggregates were computed using the mean values of the proportions of women in  
125 each category of a given variable. Since the aggregate values of each variable don’t follow a  
126 normal distribution curve, we categorized the aggregate values of a cluster into groups based on  
127 median values.

## 128 **Operational definitions**

129 **Household wealth quintile:** The wealth index classifications were done in quintiles: poorest;  
130 poor; middle; rich; richest. These were computed using principal component analyses (PCA).  
131 This variable was further categorized into three categories (Poor, Medium, and Rich) by merging  
132 the lower two (poorest and poor) quintiles and the upper two (richest and rich) quintiles.

133 **Family planning message exposure:** This variable was computed from the frequency of  
134 exposure to family planning messages from television, radio, magazine or mobile messages The  
135 variable was categorized into two parts: Not exposed when the participant is exposed to none of  
136 the four channels at least once a week; and exposed if the participant was exposed to family  
137 planning messages at least once a week from one of the four channels.

138 **Contextual region:** For this survey regions were categorized into three categories (agrarian,  
139 pastoral, and metropolitan) that may have a strong relationship to health information seeking and  
140 intention to use contraceptives. The Tigray, Amhara, Oromia, SNNP, Gambella, and  
141 Beneshangul Gumuz were recorded as agrarian. The Somali and Afar regions were merged to  
142 form the pastoralist region and the city administrations- Addis Ababa, Dire Dawa, and Harar  
143 were combined as metropolitan (1).

144 **Community female education:** This is the aggregate value of the educational levels of women  
145 based on the average of proportions of educational levels in the community. It was defined as  
146 low if the proportion of women with secondary education & above in the community was 0 –  
147 12.4 % and high if the proportion was 12.5 –100 %.

148 **Community media exposure:** This variable was derived from the individual responses for  
149 exposure to radio or television. It was defined as low if the proportion of women exposed to  
150 media in the community was 0–18.7 % and high if the proportion was 18.8–100 %.

151 **Community ANC utilization rate:** This variable is also derived from the individual values for  
152 ANC utilization. It was defined as low if the proportion of women who attended at least one  
153 ANC visit in the community was 0 – 81.3 % and high if the proportion was between 81.4 –100  
154 %.

155 **Community poverty:** With the same procedure, this variable is also derived from an individual  
156 household's wealth index. It was defined as high if the proportion of women from the two lowest  
157 wealth quintiles in a given community was 25.9–100 % and low if the proportion was 0–26 %.

158 **Community distance to the health facility:** The variable was aggregated from individual  
159 perceived distance to a health facility is a big problem. It was as categorized as low if the  
160 proportion of women who perceived health facility distance as a big problem in the community  
161 was 0–42.2% and categorized as high if the proportion was between 42.2% and 100%.

### 162 **Data processing and Analysis**

163 Data were extracted from individual records (IR) files and further coding and transformations  
164 were done using statistical software, STATA version 14. The weighted samples were used for  
165 analysis to adjust for unequal probability of selection and non-response in the original survey.  
166 Since the EDHS employed multi-stage stratified cluster sampling techniques, the data have a  
167 hierarchical structure. In such kinds of situations, single-level logistic regression is not  
168 recommended because Traditional multiple regression techniques treat the units of analysis as  
169 independent observations. One consequence of failing to recognize hierarchical structures is that  
170 standard errors of regression coefficients will be underestimated, leading to an overstatement of  
171 statistical significance. In this point of view, to draw valid inference and conclusion an advanced  
172 statistical model which takes the hierarchy of the data into account is required. Therefore, a  
173 multivariable multilevel binary logistic regression model was used to estimate the fixed and  
174 random effects of the factors associated with intention to use contraceptives. Four models were  
175 constructed. The first model also called an empty model which was fitted without any  
176 explanatory variables. This model was specified to decompose the amount of variance that  
177 existed between communities. The null model is important for understanding the community



178 variations, and we used it as a reference to estimate how much community factors were able to  
179 explain the observed variations in the intention to use contraceptives. Moreover, this model was  
180 used to justify the use of a multilevel statistical framework as it is a litmus paper on whether  
181 multilevel or the traditional logistic regression should be used. It was assessed using the Log  
182 Likelihood Ratio test (LLR), Median Odds Ratio (MOR), Intra-class Correlation Coefficient  
183 (ICC), and Proportional Change of Variance (PCV). The second model contained only  
184 individual-level factors. The third contained only community-level factors. Whereas, the final  
185 (fourth) model containing both individual and community-level factors. Moreover, the model  
186 comparison was done using model deviance, a model with the lowest deviance selected for  
187 reporting and interpretation results.

## 188 **Result**

### 189 **Individual level characteristics**

190 A total of 6,555 weighted sample of married/ in union and contraceptive non-users were  
191 involved in the present study. The median age of the women was 30 years old with an  
192 interquartile range (IQR) of 13 years. The median (IQR) husband's/partner's age was 38 (16)  
193 years. More than half of (56.6%) of the participants were affiliated to Christianity. Majority  
194 (65.68%) and more than half (50.51%) of the participants and their husbands/partners did not  
195 attend formal education respectively. About 2999 (46%) of the participant were form a house  
196 hold with poor wealth status. Concerning exposure to family planning messages, only 1572  
197 (24%) of the participants were exposed to family planning message from at least one of the four  
198 main (television, radio, magazine and mobile message) channels.

199 Almost all (98%) of the participants knew at least one of the family planning methods. However,  
 200 only 2257 (34.4%) of the participants had ever used at least once a time. Decision for not using  
 201 contraceptive was mainly made jointly by the respondents and their partner whereas 569 (10.43)  
 202 participants reported that their partners were the main decision makers for not using  
 203 contraceptives. Regarding to fertility, about 2840 (43.3%) participants hadn't desire to have  
 204 children in the future. In more than on third (35.3%) the cases both the respondents and their  
 205 partners want the same number of children to have in the future (Table 1).

206 Table 1: Sociodemographic and other individual characteristics of married/in union women in  
 207 Ethiopia (n=6555)

| Variables                            | Intended to use FP |               | Total, n (%) |
|--------------------------------------|--------------------|---------------|--------------|
|                                      | No, n (%)          | Yes, n (%)    |              |
| <b>Age</b>                           |                    |               |              |
| 15-24                                | 436 (30.15)        | 1,011 (69.85) | 1447 (22.07) |
| 25-34                                | 1,166 (43.17)      | 1,535 (56.83) | 2701 (41.21) |
| 35-49                                | 1,765 (73.35)      | 642 (26.65)   | 2407 (36.72) |
| <b>Husband's/partner's age</b>       |                    |               |              |
| 15-24                                | 89(28.14)          | 228 (71.86)   | 317 (4.84)   |
| 25-34                                | 698 (33.91)        | 1361 (66.09)  | 2059 (31.42) |
| 35-44                                | 1011 (49.06)       | 1050 (50.94)  | 2061 (31.45) |
| 45-54                                | 894(69.73)         | 388 (30.27)   | 1282(19.56)  |
| >=55                                 | 674 (80.83)        | 160 (19.17)   | 834 (12.73)  |
| <b>Religion</b>                      |                    |               |              |
| Cristian                             | 1,634 (45)         | 1,991 (55)    | 3625 (56.67) |
| Muslim                               | 1639 (59.14)       | 1133 (40.86)  | 2772(43.33)  |
| <b>Highest educational level</b>     |                    |               |              |
| No-formal education                  | 2510 (58.29)       | 1795 (41.71)  | 4305 (65.68) |
| Primary                              | 700 (40.1)         | 1048 (59.9)   | 1748 (26.67) |
| Secondary                            | 82 (26.24)         | 230 (73.76)   | 312 (4.76)   |
| Higher                               | 75 (39.55)         | 115 (60.45)   | 190 (2.90)   |
| <b>Husband's/partner's education</b> |                    |               |              |
| No formal education                  | 1999 (60.88)       | 1285 (39.12)  | 3284 (50.51) |
| Primary education                    | 972(41.77)         | 1355 (58.23)  | 2327 (35.79) |

|                                             |     |                |               |              |
|---------------------------------------------|-----|----------------|---------------|--------------|
| Secondary education                         |     | 205 (37.7)     | 338 (62.3)    | 543 (8.35)   |
| Higher education                            |     | 164 (47.11)    | 184 (52.89)   | 348 (5.35)   |
| Currently working                           |     |                |               | 0            |
| No                                          |     | 2,471 (51.99)  | 2,282 (48.01) | 4753 (72.51) |
| Yes                                         |     | 897 (49.76)    | 905 (50.24)   | 1802 (27.49) |
| Household wealth Index                      |     |                |               |              |
| Poor                                        |     | 1,628 (54.28)  | 1,371 (45.72) | 2999 (45.75) |
| Medium                                      |     | 630 (48.76)    | 662 (51.24)   | 1292 (19.71) |
| Rich                                        |     | 1,110 (49.02)  | 1,154 (50.98) | 2264 (34.54) |
| Exposure to family planning (FP) messages   |     |                |               | 0            |
| No                                          |     | 2,740 (55)     | 2,243 (45.02) | 4983 (76.02) |
| Yes                                         |     | 628(39.93)     | 944 (60.07)   | 1572 (23.98) |
| Source of FP message exposure               |     |                |               |              |
| Television                                  | No  | 3051 (52)      | 2765 (47.54)  | 5816 (88.73) |
|                                             | Yes | 316 (42.84)    | 421 (57.16)   | 739 (11.27)  |
| Radio                                       | No  | 2874(54)       | 2448 (46)     | 5322 (81.19) |
|                                             | Yes | 494 (40.05)    | 739 (59.95)   | 1233 (18.81) |
| Magazine/newspaper                          | No  | 3311 (52)      | 3085 (48.23)  | 6396 (97.57) |
|                                             | Yes | 56 (35.59)     | 103 (64.41)   | 159 (2.43)   |
| Mobile phone                                | No  | 3304 (51.33)   | 3132 (48.67)  | 6436 (98.18) |
|                                             | Yes | 64 (53.57)     | 55 (46.43)    | 119 (1.82)   |
| Told of family planning at health facility  |     |                |               |              |
| No                                          |     | 887 (48)       | 948 (51.66)   | 1835 (62.46) |
| Yes                                         |     | 396 (35.92)    | 707 (64.08)   | 1103 (37.54) |
| Told of family planning by fieldworker      |     |                |               |              |
| No                                          |     | 396 (54.8)     | 327 (45.17)   | 723 (40.89)  |
| Yes                                         |     | 430 (41.15)    | 615 (58.85)   | 1045 (59.11) |
| Heard of family planning from the community |     |                |               |              |
| No                                          |     | 2,149 (54. 43) | 1,799 (45.57) | 3948 (60.23) |
| Yes                                         |     | 1,219 (46.75)  | 1,388 (53.25) | 2607 (39.77) |
| Know a modern contraceptive                 |     |                |               |              |
| Don't know                                  |     | 123 (90.0)     | 14 (10.38)    | 138 (2.11)   |
| Know                                        |     | 3,244 (50.56)  | 3,173 (49.44) | 6417 (97.89) |
| Ever use of contraceptive                   |     |                |               |              |
| No                                          |     | 2708 (63.0)    | 1590 (37.0)   | 4298 (65.57) |
| Yes                                         |     | 660 (29.24)    | 1597 (70.76)  | 2257 (34.43) |
| Who decide for not using contraceptive      |     |                |               |              |
| Mainly respondent                           |     | 917(55.86)     | 725 (44.14)   | 1642 (30.09) |
| mainly husband/partner                      |     | 338 (59.39)    | 231 (40.61)   | 569 (10.43)  |
| joint decision                              |     | 1716 (54.45)   | 1436 (45.55)  | 3152 (57.76) |

|                           |               |               |              |
|---------------------------|---------------|---------------|--------------|
| Other                     | 73 (77.47)    | 21 (22.53)    | 94 (1.72)    |
| Fertility preference      |               |               |              |
| Have another              | 1691 (46.52)  | 2024 (54.48)  | 3715 (56.67) |
| Undecided                 | 233 (60.43)   | 152 (39.57)   | 385 (5.87)   |
| No more                   | 1288(56.1)    | 1007 (43.9)   | 2295 (35.01) |
| Declared infecund         | 156 (98.03)   | 4 (1.97)      | 160 (2.44)   |
| Desire for more children  |               |               |              |
| No                        | 1676 (59.04)  | 1164 (40.96)  | 2840 (43.33) |
| Yes                       | 1691 (45.52)  | 2024 (54.48)  | 3715 (56.67) |
| Husband's children desire |               |               |              |
| Both wants the same       | 1,094(47.26)  | 1,221 (52.74) | 2315 (35.32) |
| Husband wants more        | 1,019 (55.18) | 828 (44.82)   | 1847 (28.18) |
| Husband wants fewer       | 233 (51.7)    | 218 (48.3)    | 451 (6.88)   |
| Don't know                | 1,021 (52.59) | 921 (47.41)   | 1942 (29.63) |
| No of Children            |               |               |              |
| 0-2                       | 906 (40.61)   | 1,325 (59.39) | 2231 (34.04) |
| 3-5                       | 1,280 (49.57) | 1,301 (50.43) | 2581 (39.37) |
| 6 and above               | 1,182 (67.83) | 561 (32.17)   | 1743 (26.59) |

208 **Community level factor**

209 Majority (87.84%) of the participants were from rural residency. Whereas, 4178 (63.7%), 4734  
 210 (72.2%), 2803 (42.76), 4808 (73.35) and 3748 (57.18) of the participants were from a  
 211 community with high poverty, low community female's education, low exposure to family  
 212 planning, low community ANC utilization rate and low women's empowerment respectively.  
 213 Moreover, in the chi2 analysis, residence, community poverty, region, community level female's  
 214 education, community ANC utilization rate, community exposure to family planning messages,  
 215 community family planning utilization rate and community health facility distance problem were  
 216 significantly associated with intention to use family planning at p-value <0.05 (Table 2).

217 Table 2: Community level variables descriptive result by informed choice among contraceptive  
 218 user women in Ethiopia (n= 6,555)

| Variables | Intention to use FP, n (%) | Total, n (%) | p-value |
|-----------|----------------------------|--------------|---------|
|-----------|----------------------------|--------------|---------|

|                                            | No            | Yes           |              |        |
|--------------------------------------------|---------------|---------------|--------------|--------|
| Residence                                  |               |               |              |        |
| Urban                                      | 394 (49.50)   | 403 (50.50)   | 797 (12.16)  |        |
| Rural                                      | 2,973 (51.63) | 2,785 (48.37) | 5758 (87.84) | 0.003  |
| Contextual Region                          |               |               |              |        |
| Agrarian                                   | 2,836 (48.41) | 3,023 (51.59) | 5859 (89.38) |        |
| Pastoral                                   | 425 (84.35)   | 79 (15.65)    | 504 (7.69)   |        |
| Metropolitan                               | 106 (55.50)   | 86 (44.50)    | 192 (2.93)   | <0.001 |
| Community poverty                          |               |               |              |        |
| Low                                        | 1,202 (50.59) | 1,175 (49.41) | 2377 (36.26) |        |
| High                                       | 2,165 (51.82) | 2,013 (48.18) | 4178 (63.74) | <0.001 |
| Community female education                 |               |               |              |        |
| Low                                        | 2468 (52.14)  | 2266 (47.86)  | 4734 (72.22) |        |
| High                                       | 900 (49.39)   | 921 (50.61)   | 1821 (27.78) | <0.001 |
| Community exposure to FP messages          |               |               |              |        |
| Low                                        | 1,498 (53.45) | 1,305 (46.55) | 2803 (42.76) |        |
| High                                       | 1,869 (49.83) | 1,882 (50.17) | 3751 (57.22) | <0.001 |
| Community ANC utilization rate             |               |               |              |        |
| Low                                        | 2558 (53.21)  | 2250 (46.79)  | 4808 (73.35) |        |
| High                                       | 809 (46.33)   | 938 (53.67)   | 1747 (26.65) | <0.001 |
| Community FP utilization rate              |               |               |              |        |
| Low                                        | 1,401 (64.27) | 780 (35.73)   | 2181 (33.27) |        |
| High                                       | 1,966 (44.95) | 2,408 (55.05) | 4374 (66.73) | <0.001 |
| Community health facility distance problem |               |               |              |        |
| Low                                        | 996 (48.86)   | 1,043 (51.14) | 2039 (31.11) |        |
| High                                       | 2,371 (52.51) | 2,145 (47.49) | 4516 (68.89) | <0.001 |
| Community women's empowerment              |               |               |              |        |
| Low                                        | 1,979 (52.82) | 1,769 (47.18) | 3748 (57.18) |        |
| High                                       | 1,388 (49.45) | 1,419 (50.55) | 2807 (42.82) | 0.287  |

219 *Not: ANC= Antenatal care, FP= Family planning*

220 **Intention to use contraceptive**

221 Only 3368 (48.6%, 95% CI 47.42, 49.84) of married reproductive age women were intended to  
 222 use contraceptive in the future (Figure 1).

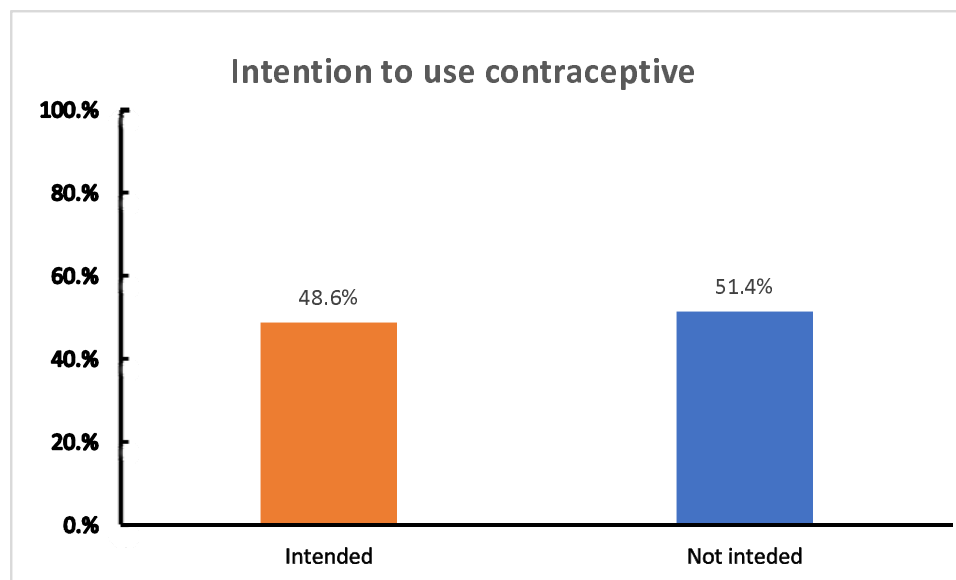

223

224 **Figure 1:** Intention to use contraceptives among married reproductive age women in Ethiopia

225 (n= 6, 555)

### 226 **Factors associated with intention to use family planning**

227 In the multilevel multivariable analysis, age, education, heard of family planning from the  
228 community, ever use of contraceptives, number of children, and community level family  
229 planning utilization rate were significant factors associated with participant's intention to use  
230 contraceptives in the future.

231 Participants within the age range of 25-34 years (AOR = 0.42, 95 CI% (0.22, 0.79)) and 35-49  
232 years (AOR = 0.12, 95% CI: (0.05, 0.28)) were less likely to be intended to use contraceptives in  
233 the future compared to participants with the age range of 15-24 years. Women's husband/partner  
234 with primary education were 1.6 times more likely to be intended to use contraceptives  
235 compared to husbands with no formal education (AOR = 1.60, 95% CI: (1.02, 2.50)).  
236 Participants heard of contraceptives from their community (AOR = 1.91, 95% CI: (1.29, 2.83))  
237 and ever used contraceptives (AOR = 4.48, 95% CI: (2.91, 6.88)) were almost two and 4.5 times

238 more likely to be intended to use contraceptives in the future respectively. In addition to this,  
 239 women who had six or more children (AOR = 0.46, 95% CI: (0.23, 0.9)) were less likely to be  
 240 intended to use contraceptives. Regarding community level variables, Women from a community  
 241 with high rate of family planning utilization were 2.3 times more likely to be intended to use  
 242 contraceptives (AOR = 2.29, 95% CI: (1.36,3.86)).

243 Table 3: Individual and community level facto associated with intention to use family planning  
 244 among married/ in union contraceptive non-user women in Ethiopia (n=6,555).

| Independent variables        | Null model | Model I                | Model III    | Model IV            |
|------------------------------|------------|------------------------|--------------|---------------------|
|                              |            | AOR [95%<br>CI]        | AOR [95% CI] | AOR [95% CI]        |
| <b>Age of the respondent</b> |            |                        |              |                     |
| 15-24                        | -          | 1                      | -            | 1                   |
| 25-34                        | -          | 0.39 (0.21,<br>0.73) * | -            | 0.42 (0.22, 0.79) * |
| 35-49                        | -          | 0.10 (0.04,<br>0.24) * | -            | 0.12 (0.05, 0.28) * |
| <b>Husband/partner's age</b> |            |                        |              |                     |
| 15-24                        | -          | 1                      | -            | 1                   |
| 25-34                        | -          | 1.05 (0.42,<br>2.61)   | -            | 0.90 (0.36, 2.27)   |
| 35-44                        | -          | 1.45 (0.54,<br>3.89)   | -            | 1.27 (0.47, 3.47)   |
| 45-54                        | -          | 1.12 (0.38,<br>3.32)   | -            | 1.03 (0.34, 3.08)   |
| >=55                         | -          | 0.39 (0.12,<br>1.27)   | -            | 0.40 (0.12, 1.33)   |
| <b>Religion</b>              |            |                        |              |                     |
| Christian                    | -          | 1                      | -            | 1                   |
| Muslim                       | -          | 0.55 (0.36,<br>0.85) * | -            | 0.76 (0.48, 1.22)   |
| <b>Education</b>             |            |                        |              |                     |
| No formal education          | -          | 1                      | -            | 1                   |
| primary                      | -          | 1.01 (0.64,<br>1.62)   | -            | 1.11 (0.69, 1.77)   |
| secondary                    | -          | 1.23 (0.56,<br>2.71)   | -            | 1.86 (0.83, 4.20)   |

|                                 |   |                     |       |                      |
|---------------------------------|---|---------------------|-------|----------------------|
|                                 |   |                     | 2.72) |                      |
| higher                          | - | 0.64 (0.23, 1.80)   | -     | 0.96 (0.34, 2.71)    |
| Husband/partner's education     |   |                     |       |                      |
| No formal education             | - | 1                   | -     | 1                    |
| Primary education               | - | 1.62 (1.04, 2.54) * | -     | 1.60 (1.02, 2.50) *  |
| Secondary education             | - | 0.84 (0.43, 1.65)   | -     | 1.06 (0.54, 2.10)    |
| Higher education                | - | 1.29 (0.58, 2.90)   | -     | 1.58 (0.70, 3.56)    |
| Exposure to FP messages         |   |                     |       |                      |
| Not exposed                     | - | 1                   | -     | 1                    |
| Exposed                         | - | 1.13 (0.73, 1.75)   | -     | 1.17 (0.74, 1.84)    |
| Told of FP at health facility   |   |                     |       |                      |
| No                              | - | 1                   | -     | 1                    |
| yes                             | - | 1.45 (0.93, 2.26)   | -     | 1.35 (0.87, 2.10)    |
| Told of FP by field worker      |   |                     |       |                      |
| No                              | - | 1                   | -     | 1                    |
| Yes                             | - | 1.03 (0.65, 1.62)   | -     | 1.01 (0.64, 1.58)    |
| Heard of FP from the community  |   |                     |       |                      |
| No                              | - | 1                   | -     | 1                    |
| Yes                             | - | 2.13 (1.44, 3.15) * | -     | 1.91 (1.29, 2.83) ** |
| Knowledge of FP                 |   |                     |       |                      |
| Don't know                      | - | 1                   | -     | 1                    |
| Know                            | - | 8.62 (0.97, 76.33)  | -     | 7.51 (0.85, 66.53)   |
| Ever use of FP                  |   |                     |       |                      |
| No                              | - | 1                   | -     | 1                    |
| Yes                             | - | 4.89 (3.18, 7.52) * | -     | 4.48 (2.91, 6.88) ** |
| Decision maker for not using FP |   |                     |       |                      |
| Mainly the respondent           | - | 1                   | -     | 1                    |
| Mainly husband, partner         | - | 1.02 (0.49, 2.10)   | -     | 1.07 (0.52, 2.23)    |
| Joint decision                  | - | 1.23 (0.82, 1.86)   | -     | 1.24 (0.83, 1.88)    |
| Other                           | - | 1.20 (0.20, 2.72)   | -     | 1.29 (0.21, 7.90)    |



|                              |   |                   |                   |                     |
|------------------------------|---|-------------------|-------------------|---------------------|
|                              |   |                   | 7.23)             |                     |
| Fertility preference         |   |                   |                   |                     |
| Have more/undecided          | - | 1                 | -                 | 1                   |
| No more/declared infecund    | - | 1.17 (0.49, 2.81) | -                 | 1.03 (0.44, 2.40)   |
| Desire to have children      |   |                   |                   |                     |
| No                           | - | 1                 | -                 | 1                   |
| Yes                          | - | 1.04 (0.44, 2.42) | -                 | 1.03 (0.45, 2.34)   |
| Household wealth index       |   |                   |                   |                     |
| Poor                         | - | 1                 | -                 | 1                   |
| Medium                       | - | 1.20 (0.70, 2.06) | -                 | 1.00 (0.58, 1.73)   |
| Rich                         | - | 0.86 (0.52, 1.42) | -                 | 0.92 (0.51, 1.65)   |
| Husbands desire for children |   |                   |                   |                     |
| Husband wants the same       | - | 1                 | -                 | 1                   |
| husband wants more           | - | 0.70 (0.44, 1.13) | -                 | 0.68 (0.42, 1.09)   |
| husband wants fewer          | - | 1.18 (0.59, 2.39) | -                 | 1.16 (0.58, 2.33)   |
| don't know                   | - | 0.91 (0.57, 1.44) | -                 | 0.94 (0.59, 1.48)   |
| No. of children              |   |                   |                   |                     |
| 0-2                          | - | 1                 | -                 | 1                   |
| 3-5                          | - | 0.81 (0.48, 1.35) | -                 | 0.74 (0.44, 1.24)   |
| 6 and above                  | - | 0.51 (0.26, 1.00) | -                 | 0.46 (0.23, 0.91) * |
| Residence                    |   |                   |                   |                     |
| Rural                        | - | -                 | 1                 | 1                   |
| Urban                        | - | -                 | 0.92 (0.67, 1.26) | 0.68 (0.32, 1.45)   |
| Region                       |   |                   |                   |                     |
| Pastoral                     | - | -                 | 1                 | 1                   |
| Agrarian                     | - | -                 | 2.23 (1.80, 2.76) | 1.52 (0.91, 2.56)   |
|                              |   |                   | *                 |                     |
| Metropolitan                 | - | -                 | 1.28 (0.94, 1.75) | 0.86 (0.41, 1.79)   |
| Community poverty            |   |                   |                   |                     |
| High                         | - | -                 | 1                 | 1                   |
| Low Poverty                  | - | -                 | 0.89 (0.70, 1.13) | 1.24 (0.68, 2.23)   |
| Community female education   |   |                   |                   |                     |
| Low                          | - | -                 | 1                 | 1                   |

|                                        |                  |                   |                   |                    |
|----------------------------------------|------------------|-------------------|-------------------|--------------------|
| High                                   | -                | -                 | 1.10 (0.88, 1.38) | 0.61 (0.35, 1.10)  |
| Community FP message exposure          |                  |                   |                   |                    |
| Low                                    | -                | -                 | 1                 | 1                  |
| High                                   | -                | -                 | 1.31(1.06,1.62)*  | 0.94 (0.56, 1.58)  |
| Community ANC utilization rate         |                  |                   |                   |                    |
| Low                                    | -                | -                 | 1                 | 1                  |
| High                                   | -                | -                 | 1.22(0.98, 1.52)  | 1.07 (0.66, 1.76)  |
| Community FP utilization               |                  |                   |                   |                    |
| Low                                    | -                | -                 | 1                 | 1                  |
| High                                   | -                | -                 | 3.21 (2.61,3.95)  | 2.29 (1.36,3.86) * |
| Community HF distance problem          |                  |                   |                   |                    |
| High                                   | -                | -                 |                   | 1                  |
| Low                                    | -                | -                 | 0.84 (0.68, 1.04) | 0.71 (0.44, 1.13)  |
| Community women's empowerment          |                  |                   |                   |                    |
| Low                                    | -                | -                 | 1                 | 1                  |
| High                                   | -                | -                 | 0.95 (0.79, 1.14) | 0.90 (0.59, 1.39)  |
| Random parameters and model comparison |                  |                   |                   |                    |
| Community level variance               | 1.36             | 0.74              | 0.55              | 0.50               |
| ICC (%)                                | 25.8             | 15.9              | 12.2              | 11.31              |
| MOR (95% CI)                           | 3.03(2.74, 3.37) | 2.26 (1.62, 3.99) | 2.02 (1.86, 2.21) | 1.96(1.40, 3.79)   |
| PCV (%)                                | Reference        | 45.6              | 59.9              | 63.25              |
| DIC (-2LLR)                            | -4154.98         | 931.7             | 7962.8            | 900.0              |

245 Note: \* significant at p-value <0.05, \*\* Significant at p-value <0.001, ICC= Intra cluster  
 246 correlation, MOR= Median Odds Ratio, PCV= Proportional Change of Variance, DIC=  
 247 Deviance information criterion, LLR=Log Likelihood Ratio

## 248 Discussion

249 The aim of this study was to assess future intention to use contraceptives and associated factors  
 250 among married/ in union women who were not current contraceptive user. The proportion of  
 251 participants who were intended to use contraceptive in the future was 48.63 (47.42-49.84). This  
 252 figure is less observed than studies conducted in Indonesia 63%(29), in Ghana 70%(30, 31), in

253 Uganda(32), in Malawi (33), in Ethiopia 84.3% (34) and it is almost in agreement with studies  
254 conducted in Ghana 49.3%(35), however this figure is higher than studies investigated in  
255 Ethiopia (17, 36). The possible justification why the observed findings of this study is less than  
256 the above mentioned one might be due to countries profiles of family planning experience,  
257 participants attitude, knowledge and education backgrounds towards family planning intention.  
258 On the other hand, this study founds significantly higher prevalence of intention to use  
259 contraceptives, might be regarding to minimizing confounding factors both on the individuals  
260 and community level factors that could have positive or negative implication on the intention to  
261 use contraceptives. Majority of those studies concluded the intention to use contraceptive based  
262 on individual factors with a very limited sample size and setting of the study. This might have  
263 increased their prevalence findings.

264 This study discovered that age was one of the main predictor's variables. Participants whose age  
265 group is from 25 to 34 years and 35 to 49 years old have less likely intention to use  
266 contraceptives in their future family than the younger. This finding is in agreement with many  
267 other studies conducted at various study setting with different times. A study conducted in  
268 Cameron (37), in Zambia(38), in Uganda (32), in Malawi (33), and in Ethiopia (39). This is  
269 related to the fact that older women may be in less need of contraceptive methods(40). This also  
270 can be explained by as mothers gets older and older, their ability to give birth may decrease and  
271 they may experience health problems, sometimes due to pregnancy or related reasons. On the  
272 other hand, they may think they are infertile due to their age and also may have a negative view  
273 of modern contraceptives.

274 The study also depicted that those women's husband who have formal education has more likely  
275 intention to use contraceptive in the near future than their counterparts having no formal

276 education. This investigation almost similar with other studies done in Ethiopia (23, 41). In  
277 Pakistan (42), in Cameroon (43), in Uttar Pradesh (44) and in Nigeria (45). Male partners,  
278 especially in rural Ethiopia, have a tradition of domination family matters, sometimes by their  
279 own interests. Education is the major key to solve this challenges of self-determination in family  
280 issues (46, 47). Education can enhance humans romantic relationship, sense of humor and ability  
281 to make informed decision making cultures with their female partners (48, 49). The results of  
282 this study also illustrate this fact.

283 The other interesting variable was those participants who had heard from the community about  
284 contraceptive or family planning have more tendency of intention to use contraceptives. This  
285 finding is supported by several studies conducted in low and middle income countries' (50), in  
286 Ethiopia(51), in SSA (52), in Rwanda(53), and in Nigeria (54). This shows that a favorable  
287 community level information of contraceptives were significant predictors of intention to use  
288 modern contraceptive methods and should take into consideration during the development of  
289 Ethiopian family planning programs. The increase in the number of people who have heard of  
290 the positive benefits of contraceptives in the community is one indication that mothers are ready  
291 to do whatever is best for the community.

292 Individuals who have ever used family planning at least once in their life time has more  
293 favorable interest to use the contraceptive methods once again in their future life. These  
294 participants who have ever used contraceptives at least once may increase their awareness and  
295 knowledge about the service over time. Their awareness and knowledge in turn might increase  
296 the intention to use contraceptives through the exposure and counseling received from health  
297 care providers. This idea is supported by studies conducted in Ethiopia (34, 39), in Yemen(55),  
298 and in Malaysia (56)

299 Mothers having six and more than six children have shown less positive intention to apply family  
300 planning in the near future than their counterparts. This finding is in disagreement studies  
301 conducted in Ethiopia (39, 57). The reason why mothers with six or more than six number of  
302 children do not use contraceptives is because they might have a low and negative attitude of  
303 contraception or have much pressure and future need of children on themselves, their partners or  
304 the community to have more children or think they will not have children later due to their aging  
305 or uneducated. They may be also using contraceptive method is offensive and forbidden in their  
306 religion and cultural practices (58). Those participants might have also faced geographic  
307 challenges and unavailability of resources (59). Some wealthier women also mentioned that  
308 using contraceptive methods have health concern issues and infrequent sex (50).

309 Participants living in a community which family planning coverage is more utilized have a  
310 greater positive tendency to apply family planning for future upcoming years than those living in  
311 less utilized communities. This finding is supported by studies conducted in Pakistan, Rwanda  
312 and Taiwan with a conclusion of accessing of family planning services did not depend only  
313 mothers own individual level factors but also by the factors of her household and community  
314 level factors (60-62). Other study in Ethiopia also again showed that, Ethiopia will more  
315 privilege through community based outreach, and interpersonal communication that could  
316 effectively modified the knowledge and behavior of women of intention to use contraceptives  
317 (63). Certain community members are almost similar in the knowledge, attitudes and way of  
318 life. Thus, it is important for mothers to decide whether or not to use contraceptives. For  
319 example, when people around her who have a positive view of modern contraception and have a  
320 better quality and a healthier baby, mother will develop more courage and self-confidence the  
321 intention to use modern contraceptives. Perhaps she could explain to others in her community

322 that using contraception would be better for her, her baby and her family. Or, if she has a  
323 misconception view of birth control, she is more likely to benefit from it if the majority of the  
324 community benefits. She can easily find the information he needs through her friends and  
325 community.

## 326 **Conclusion**

327 The findings of this study revealed that intention to use contraceptives in the near future among  
328 married women current contraceptive nonusers was very low. Age of women, educational status  
329 of male partners, ever use of contraceptives, heard of contraceptives information from the  
330 community, having six and a greater number of children and higher community utilization family  
331 planning utilization rate were factors that statistically significant variables associated with  
332 intention to use contraceptives. Thus, public health interventions particularly that could increase  
333 information dissemination regarding contraceptives among the communities and enhance  
334 community level contraceptive utilization rate are urgently required at the national level to  
335 address potential hindering factors and to improve the rate of contraceptive utilization in  
336 Ethiopia.

## 337 **Strength and limitation of the study**

338 The strength of this study includes the use of a large sample size. As the sample size increases,  
339 the sample gets closer to the actual population, which decreases the potential for deviations from  
340 the actual population. In addition to this, an advanced statistical model that can take the nature of  
341 the data into account was employed. However, the present study should be interpreted with  
342 several limitation that includes; because of the cross-sectional nature of the study, making casual

343 inferences about the observed associations might not be possible. Moreover, social desirability  
344 bias might be introduced as far as the data were entirely based on self-reports.

## 345 **Declarations**

## 346 **Acknowledgments**

347 Authors acknowledged the DHS program office to take the ethical consideration of this study

## 348 **Statement of authors contribution**

349 KS: Conceptualization, data curation, formal analysis, investigation, methodology, resources,  
350 software, validation, visualization, writing – original draft, writing – review & editing. BT, AZA,  
351 TSA: Data curation, formal analysis, investigation, methodology, resources, software, validation,  
352 visualization, writing – original draft, writing – review & editing. All the authors read and  
353 approved the final manuscript.

## 354 **Funding statement**

355 This research did not receive any specific grant from funding agencies in the public, commercial,  
356 or not-for-profit sectors.

## 357 **Competing interest statement**

358 The authors declare no conflict of interest.

## 359 **Availability of data**

360 Data for this study were obtained from the DHS Program.

361 **Consents for publication**

362 Not applicable

363 **Ethical approval and consent to participate**

364 Ethical approval and permission letter was requested online to DHS program at  
365 [www.dhsprogram.com](http://www.dhsprogram.com) to access the data for this study and DHS program was granted the  
366 permission through email.

367 **References**

- 368 1. EPHIEE I. Ethiopia mini demographic and health survey 2019: key indicators. USA:  
369 EPHI and ICF; 2019.
- 370 2. Kantorová V, Wheldon MC, Ueffing P, Dasgupta AN. Estimating progress towards  
371 meeting women's contraceptive needs in 185 countries: A Bayesian hierarchical modelling  
372 study. PLoS medicine. 2020;17(2):e1003026.
- 373 3. United Nations Department of Economic and Social Affairs Population Division NY.  
374 Family Planning and the 2030 Agenda for Sustainable Development • Data Booklet. 2019.
- 375 4. United Nations DoEaSA, Population Division World Family Planning -Highlights  
376 (ST/ESA/SER.A/414). 2017.
- 377 5. Darroch JE, Sully E, Biddlecom A. Adding it up: investing in contraception and maternal  
378 and newborn health, 2017—supplementary tables. New York, NY: The Guttmacher Institute.  
379 2017.
- 380 6. Stover J, Ross J. How increased contraceptive use has reduced maternal mortality.  
381 Maternal and child health journal. 2010;14(5):687-95.



- 382 7. Cleland J, Conde-Agudelo AP. H., Ross, J., & Tsui, A. Contraception and health,  
383 Lancet.380(9837):149-56.
- 384 8. Bearak J, Popinchalk A, Alkema L, Sedgh G. Global, regional, and subregional trends in  
385 unintended pregnancy and its outcomes from 1990 to 2014: estimates from a Bayesian  
386 hierarchical model. The Lancet Global Health. 2018;6(4):e380-e9.
- 387 9. Sedgh G, Bearak J, Singh S, Bankole A, Popinchalk A, Ganatra B, et al. Abortion  
388 incidence between 1990 and 2014: global, regional, and subregional levels and trends. The  
389 Lancet. 2016;388(10041):258-67.
- 390 10. Singh S, Darroch JE, Ashford LS. Adding it up: the costs and benefits of investing in  
391 sexual and reproductive health 2014. 2014.
- 392 11. United Nations Educational SaCOU. Developing an education sector response to early  
393 and unintended pregnancy. Paris (France): UNESCO; 2014. 2014.
- 394 12. Darroch JE, Woog V, Bankole A, Ashford LS. Adding it up: costs and benefits of  
395 meeting the contraceptive needs of adolescents. 2016.
- 396 13. Catalog WBD. Population Estimates And Projections. 2020.
- 397 14. Affairs UNDoEaS. . World Fertility and Family Planning 2020.
- 398 15. Asefa G, Birhanu Z. FERTILITY AND FAMILY PLANNING IMPLICATIONS OF  
399 ETHIOPIA'S FP2020 TARGET. 2014.
- 400 16. Adane AA, Bekele YA, Melese E, Worku GT, Netsere HB. Modern contraceptive  
401 utilization and associated factors among married Gumuz women in Metekel Zone North West  
402 Ethiopia. BioMed Research International. 2020;2020.

- 403 17. Meskele M, Mekonnen W. Factors affecting women's intention to use long acting and  
404 permanent contraceptive methods in Wolaita Zone, Southern Ethiopia: A cross-sectional study.  
405 BMC women's health. 2014;14(1):1-9.
- 406 18. Degefa Hidru H, Dingeta T, Menigiste B, Etsay B, Gebremedhin H, Berwo M, et al.  
407 Modern Contraceptive Utilization and Its Associated Factors among Indigenous and  
408 Nonindigenous Married Women of Reproductive Age Group in Jigjiga Town, Eastern Ethiopia,  
409 2018. BioMed Research International. 2020;2020.
- 410 19. Gebre MN, Edossa ZK. Modern contraceptive utilization and associated factors among  
411 reproductive-age women in Ethiopia: evidence from 2016 Ethiopia demographic and health  
412 survey. BMC women's health. 2020;20(1):1-14.
- 413 20. Mekonnen BD, Wubneh CA. Prevalence and associated factors of contraceptive  
414 discontinuation among reproductive-age women in Ethiopia: using 2016 Nationwide Survey  
415 Data. Reproductive Health. 2020;17(1):1-10.
- 416 21. Bitew F, Nyarko SH. Modern contraceptive use and intention to use: implication for  
417 under-five mortality in Ethiopia. Heliyon. 2019;5(8):e02295.
- 418 22. Belda SS, Haile MT, Melku AT, Tololu AK. Modern contraceptive utilization and  
419 associated factors among married pastoralist women in Bale eco-region, Bale Zone, South East  
420 Ethiopia. BMC health services research. 2017;17(1):1-12.
- 421 23. Debebe S, Limenih MA, Biadgo B. Modern contraceptive methods utilization and  
422 associated factors among reproductive aged women in rural Dembia District, northwest Ethiopia:  
423 Community based cross-sectional study. International Journal of Reproductive BioMedicine.  
424 2017;15(6):367.

- 425 24. Geremew AB, Gelagay AA. Modern contraceptive use and associated factors among  
426 married women in Finote Selam town Northwest Ethiopia: a community based cross-sectional  
427 study. *Women's midlife health*. 2018;4(1):1-8.
- 428 25. Mohammed A, Woldeyohannes D, Feleke A, Megabiaw B. Determinants of modern  
429 contraceptive utilization among married women of reproductive age group in North Shoa Zone,  
430 Amhara Region, Ethiopia. *Reproductive health*. 2014;11(1):1-7.
- 431 26. Abraha TH, Teferra AS, Gelagay AA. Postpartum modern contraceptive use in northern  
432 Ethiopia: prevalence and associated factors. *Epidemiology and health*. 2017;39.
- 433 27. Tekelab T, Melka AS, Wirtu D. Predictors of modern contraceptive methods use among  
434 married women of reproductive age groups in Western Ethiopia: a community based cross-  
435 sectional study. *BMC women's health*. 2015;15(1):1-8.
- 436 28. Csa I. Central statistical agency (CSA)[Ethiopia] and ICF. Ethiopia demographic and  
437 health survey, Addis Ababa, Ethiopia and Calverton, Maryland, USA. 2016.
- 438 29. Utomo B, Suahya PK, Romadlona NA, Robertson AS, Aryanty RI, Magnani RJ. The  
439 impact of family planning on maternal mortality in Indonesia: what future contribution can be  
440 expected? *Population Health Metrics*. 2021;19(1):1-13.
- 441 30. Eliason S, Baiden F, Quansah-Asare G, Graham-Hayfron Y, Bonsu D, Phillips J, et al.  
442 Factors influencing the intention of women in rural Ghana to adopt postpartum family planning.  
443 *Reproductive health*. 2013;10(1):1-8.
- 444 31. Der AD, Anaman-Torgbor JA, Charles-Unadike VO, Tarkang EE. Predictors of intention  
445 to use modern contraceptives among female senior secondary school students in the Kpando  
446 Municipality, Ghana. *African Health Sciences*. 2021;21(3):1375-84.

- 447 32. Lutalo T, Gray R, Santelli J, Guwatudde D, Brahmbhatt H, Mathur S, et al. Unfulfilled  
448 need for contraception among women with unmet need but with the intention to use  
449 contraception in Rakai, Uganda: a longitudinal study. *BMC women's health*. 2018;18(1):1-7.
- 450 33. Forty J, Rakgoasi SD, Keetile M. Patterns and determinants of modern contraceptive use  
451 and intention to use contraceptives among Malawian women of reproductive ages (15–49 years).  
452 *Contraception and reproductive medicine*. 2021;6(1):1-12.
- 453 34. Abraha TH, Belay HS, Welay GM. Intentions on contraception use and its associated  
454 factors among postpartum women in Aksum town, Tigray region, northern Ethiopia: a  
455 community-based cross-sectional study. *Reproductive health*. 2018;15(1):1-8.
- 456 35. Bawah AA, Asuming P, Achana SF, Kanmiki EW, Awoonor-Williams JK, Phillips JF.  
457 Contraceptive use intentions and unmet need for family planning among reproductive-aged  
458 women in the Upper East Region of Ghana. *Reproductive health*. 2019;16(1):1-9.
- 459 36. Tiruneh FN, Chuang K-Y, Ntenda PA, Chuang Y-C. Factors associated with  
460 contraceptive use and intention to use contraceptives among married women in Ethiopia. *Women  
461 & health*. 2016;56(1):1-22.
- 462 37. Rai RK. Future intention of contraceptive use among Comorian women, 2012. *Journal of  
463 Public Health*. 2015;23(5):289-96.
- 464 38. Lasong J, Zhang Y, Gebremedhin SA, Opoku S, Abaidoo CS, Mkandawire T, et al.  
465 Determinants of modern contraceptive use among married women of reproductive age: a cross-  
466 sectional study in rural Zambia. *BMJ open*. 2020;10(3):e030980.
- 467 39. Oumer M, Manaye A, Mengistu Z. Modern contraceptive Method utilization and  
468 associated factors among women of reproductive age in Gondar City, Northwest Ethiopia. *Open  
469 Access Journal of Contraception*. 2020;11:53.

- 470 40. Endriyas M, Eshete A, Mekonnen E, Misganaw T, Shiferaw M, Ayele S. Contraceptive  
471 utilization and associated factors among women of reproductive age group in Southern Nations  
472 Nationalities and Peoples' Region, Ethiopia: cross-sectional survey, mixed-methods.  
473 Contraception and reproductive medicine. 2017;2(1):1-9.
- 474 41. Wondim G, Degu G, Teka Y, Diress G. Male Involvement in Family Planning Utilization  
475 and Associated Factors in Womberma District, Northern Ethiopia: Community-Based Cross-  
476 Sectional Study. Open Access Journal of Contraception. 2020;11:197.
- 477 42. Asif MF, Pervaiz Z, Afridi JR, Abid G, Lassi ZS. Role of husband's attitude towards the  
478 usage of contraceptives for unmet need of family planning among married women of  
479 reproductive age in Pakistan. BMC Women's Health. 2021;21(1):1-7.
- 480 43. Egbe T, Ketchen S, Egbe E, Ekane G, Belley-Priso E. Risk factors and barriers to male  
481 involvement in the choice of family planning methods in the Buea Health District, south west  
482 region, Cameroon: a cross-sectional study in a semi-urban area. Women Health Open J.  
483 2016;1(3):82-90.
- 484 44. Singh A, Singh K, Verma P. Knowledge, attitude and practice GAP in family planning  
485 usage: an analysis of selected cities of Uttar Pradesh. Contraception and reproductive medicine.  
486 2016;1(1):1-10.
- 487 45. Ijadunola MY, Abiona TC, Ijadunola KT, Afolabi OT, Esimai OA, OlaOlorun FM. Male  
488 involvement in family planning decision making in Ile-Ife, Osun State, Nigeria. African journal  
489 of reproductive health. 2010;14(4).
- 490 46. Adera A, Belete T, Gebru A, Hagos A, Gebregziabher W. Assessment of the role of men  
491 in family planning utilization at Edaga-Hamuse town, Tigray, North Ethiopia. Am J Nurs Sci.  
492 2015;4(4):174.

- 493 47. Demissie DB, Kurke A, Awel A, Oljira K. Male involvement in family planning and  
494 associated factors among Marriedin Malegedo town west Shoa zone, Oromia, Ethiopia. *planning*.  
495 2016;15.
- 496 48. Weisfeld GE, Nowak NT, Lucas T, Weisfeld CC, Imamoğlu EO, Butovskaya M, et al.  
497 Do women seek humorousness in men because it signals intelligence? A cross-cultural test.  
498 2011.
- 499 49. Hall JA. Humor in romantic relationships: A meta-analysis. *Personal Relationships*.  
500 2017;24(2):306-22.
- 501 50. Moreira LR, Ewerling F, Barros AJ, Silveira MF. Reasons for nonuse of contraceptive  
502 methods by women with demand for contraception not satisfied: an assessment of low and  
503 middle-income countries using demographic and health surveys. *Reproductive health*.  
504 2019;16(1):1-15.
- 505 51. Abate MG, Tareke AA. Individual and community level associates of contraceptive use  
506 in Ethiopia: a multilevel mixed effects analysis. *Archives of Public Health*. 2019;77(1):1-12.
- 507 52. Zimmerman LA, Bell SO, Li Q, Morzenti A, Anglewicz P, Group PPI, et al. Individual,  
508 community and service environment factors associated with modern contraceptive use in five  
509 Sub-Saharan African countries: A multilevel, multinomial analysis using geographically linked  
510 data from PMA2020. *PloS one*. 2019;14(6):e0218157.
- 511 53. Habyarimana F, Ramroop S. The analysis of socio-economic and demographic factors  
512 associated with contraceptive use among married women of reproductive age in Rwanda. *The*  
513 *Open Public Health Journal*. 2018;11(1).
- 514 54. Ejembi CL, Dahiru T, Aliyu AA. Contextual factors influencing modern contraceptive  
515 use in Nigeria. *DHS Working Papers*. 2015(120).

- 516 55. Masood MS, Alsonini NA. Knowledge and attitude about reproductive health and family  
517 planning among young adults in Yemen. *International Journal of Population Research*.  
518 2017;2017.
- 519 56. Elkalmi RM, Khan MU, Ahmad A, Srikanth AB, Abdurhaman NS, Jamshed SQ, et al.  
520 Knowledge, awareness, and perception of contraception among senior pharmacy students in  
521 Malaysia: A pilot study. *Journal of research in pharmacy practice*. 2015;4(2):94.
- 522 57. Alemayehu GA, Fekadu A, Yitayal M, Kebede Y, Abebe SM, Ayele TA, et al.  
523 Prevalence and determinants of contraceptive utilization among married women at Dabat Health  
524 and Demographic Surveillance System site, northwest Ethiopia. *BMC women's health*.  
525 2018;18(1):1-7.
- 526 58. Agha S. Intentions to use contraceptives in Pakistan: implications for behavior change  
527 campaigns. *BMC public health*. 2010;10(1):1-13.
- 528 59. UNFPA. 5 Upsetting Reasons Women Aren't Using Family Planning Around the World  
529 Today. 2022.
- 530 60. Stephenson R, Hennink M. Barriers to family planning service use among the urban poor  
531 in Pakistan. *Asia-Pacific Population Journal*. 2004;19(2):5-26.
- 532 61. Farmer DB, Berman L, Ryan G, Habumugisha L, Basinga P, Nutt C, et al. Motivations  
533 and constraints to family planning: a qualitative study in Rwanda's Southern Kayonza District.  
534 *Global Health: Science and Practice*. 2015;3(2):242-54.
- 535 62. Wang RH, Cheng CP, Chou FH. A causal model of contraceptive intention and its gender  
536 comparison among Taiwanese sexually inexperienced adolescents. *Journal of clinical Nursing*.  
537 2008;17(7):930-9.

538 63. Bang K-S, Chae S-M, Lee I, Yu J, Kim J. Effects of a community outreach program for  
539 maternal health and family planning in Tigray, Ethiopia. Asian nursing research.  
540 2018;12(3):223-30.

541
